# Supplementary material
Source: PubMed Central journal article supplement (PMC3087479)

**Table S1. Primers used to quantitatively amplify the human miRNAs precursors and indicated genes**

|             | Forward primer (5'→3')             | Reverse primer (5'→3') |
|-------------|------------------------------------|------------------------|
| U6          | CTCGCTTCGGCAGCAC                   | AACGCTTCACGAATTTGCGT   |
| 5S          | TACGGCCATACCACCCTGAA               | TAACCAGGCCCGACCCTGCT   |
| let-7d      | AGAGGTAGTAGGTTGCATAGTT             |                        |
| miR-101#    | <b>AAAAA</b> TACAGTACTGTGATAACTGAA |                        |
| miR-106a    | AAAAGTGCTTACAGTGCAGGTAG            |                        |
| miR-106b#   | <b>AAATAA</b> AGTGCTGACAGTGCAGAT   |                        |
| miR-10a     | TACCCTGTAGATCCGAATTTGTG            |                        |
| miR-130b    | CAGTGCAATGATGAAAGGGCAT             |                        |
| miR-142-3p# | <b>AAATG</b> TAGTGTTCCTACTTTATGGA  |                        |
| miR-142-5p# | <b>AAAAC</b> ATAAAGTAGAAAGCACTACT  |                        |
| miR-146a#   | <b>AAATG</b> AGAACTGAATTCATGGGTT   |                        |
| miR-146b    | TGAGAACTGAATTCATAGGCT              |                        |
| miR-155     | TTAATGCTAATCGTGATAGGGGT            |                        |
| miR-15a     | TAGCAGCACATAATGGTTTGTG             |                        |
| miR-16      | TAGCAGCACGTAATATTGGCG              |                        |
| miR-17      | CAAAGTGCTTACAGTGCAGGTAG            |                        |
| miR-184     | TGGACGGAGAACTGATAAGGGT             |                        |
| miR-18a     | TAAGGTGCATCTAGTGCAGATAG            |                        |
| miR-193a    | TGGGTCTTTGCGGGCGAGATGA             |                        |
| miR-195     | CCAATATTGGCTGTGCTGCTCC             |                        |
| miR-198     | GGTCCAGAGGGGAGATAGGTTT             |                        |
| miR-199a*   | ACAGTAGTCTGCACATTGGTTA             |                        |
| miR-19a#    | <b>AAATG</b> TGCAAATCTATGCAAAACTGA |                        |
| miR-19b#    | <b>ATGTG</b> CAAATCCATGCAAAACTGA   |                        |
| miR-206     | TGGAATGTAAGGAAGTGTGTGG             |                        |
| miR-20b     | CAAAGTGCTCATAGTGCAGGTAG            |                        |
| miR-21      | TAGCTTATCAGACTGATGTTGA             |                        |
| miR-214#    | ACAGCAGGCACAGACAGGCAG              |                        |
| miR-22      | AAGCTGCCAGTTGAAGAAGTGT             |                        |
| miR-221     | AGCTACATTGTCTGCTGGGTTTC            |                        |
| miR-222     | AGCTACATCTGGCTACTGGGTC             |                        |
| miR-23a     | ATCACATTGCCAGGGATTTC               |                        |
| miR-25      | CATTGCACTTGTCTCGGTCTGA             |                        |
| miR-26a     | TTCAAGTAATCCAGGATAGGCT             |                        |
| miR-29a     | TAGCACCATCTGAAATCGGTTA             |                        |
| miR-29C#    | <b>ATAGC</b> ACCATTTGAAATCGGTTA    |                        |
| miR-30a     | TGTAAACATCCTCGACTGGAAG             |                        |
| miR-30b     | TGTAAACATCCTACACTCAGCT             |                        |
| miR-30e-3p  | CTTTCAGTCGGATGTTTACAGC             |                        |
| miR-30e-5p# | <b>AAATG</b> TAAACATCCTTGACTGGA    |                        |
| miR-31      | AGGCAAGATGCTGGCATAGCT              |                        |
| miR-338     | AACAATATCCTGGTGCTGAGTG             |                        |
| miR-342     | AGG GGT GCT ATC TGT GAT TGA        |                        |
| miR-34b     | CAATCACTAACTCCACTGCCAT             |                        |
| miR-363*    | CGG GTG GAT CAC GAT GCA ATT T      |                        |
| miR-373*    | ACTCAAAATGGGGGCGCTTTCC             |                        |

|                     | Forward primer (5'→3')                        | Reverse primer (5'→3')                         |
|---------------------|-----------------------------------------------|------------------------------------------------|
| miR-374a#           | <b>AAA</b> ATTATAATACAACCTGATAAGTG            |                                                |
| miR-422b            | CTGGACTTGGAGTCAGAAGG                          |                                                |
| miR-424#            | <b>AAAC</b> CAGCAGCAATTCATGTTTTGAA            |                                                |
| miR-451#            | AAAAAAACCGTTACCATTACTGAGTT                    |                                                |
| miR-523             | GAACGCGCTTCCCTATAGAGGGT                       |                                                |
| miR-549#            | <b>AAAA</b> ATGACAACCTATGGATGAGCTCT           |                                                |
| miR-552#            | <b>AAAA</b> ACAGGTGACTGGTTAGACAA              |                                                |
| miR-569#            | <b>AAAA</b> AGTTAATGAATCCTGGAAAGT             |                                                |
| mR-656#             | <b>AAAA</b> AAAAATATTATACAGTCAACCTCT          |                                                |
| miR-765             | TGGAGGAGAAGGAAGGTGATG                         |                                                |
| miR-768#            | GTTGGAGGATGAAAGTACGGAGTG                      |                                                |
| miR-92              | TATTGCACTTGTCCCGCCTG                          |                                                |
| miR-93              | CAAAGTGCTGTTCTGTCAGGTAG                       |                                                |
| miR-95#             | <b>A</b> ATTCAACGGGTATTTATTGAGCA              |                                                |
| miR-98#             | <b>AA</b> ATGAGGTAGTAAGTTGTATTGTT             |                                                |
| LV-miR-155WT        | <u>GAGGATCC</u> TAAAGGTAACAATGTCATCT          | GAGGTCGACGAATATATTTTTCTGTTAATG                 |
| LV-miR -<br>155MUT@ | <b><i>AATTACG</i></b> AAATCGTGATAGGGGTTTTTGCC | ACCCCTATCACGATT <b><i>TCGTA</i></b> ATTCAGCATA |
| pGL-KPC1-WT         | AAC <u>GCTAGC</u> CTGGAACCTCCACCTTTGAA        | AAG <u>CTCGAG</u> TGTATGGAATAATAATTTAATGCTCAC  |
| pGL-KPC1-MUT        | AAC <u>GCTAGC</u> CTGGAACCTCCACCTTTGAA        | TAG <u>CTCGAG</u> TGTATGGAATAATAATAATTTGCTCAC  |
| pGL-CD115-WT        | GAT <u>CTCGAG</u> CAAACCTCTGCCTTCGGTCAT       | GAT <u>GTCGACT</u> TAATGCTGTTAGTTTAATGTGGACAGA |
| pGL-CD115-MUT       | GAT <u>CTCGAG</u> CAAACCTCTGCCTTCGGTCAT       | GAT <u>GTCGAC</u> AATTACCTGTTAGTTTAATGTGGACAGA |
| pGL-SOCS-1-WT       | AAT <u>GCTAGC</u> CCCGGCAGCGCCCGCCGTGC        | CAT <u>CTCGAG</u> CTGCACAGCAGAAAAATAAAGC       |
| pGL-SOCS-1-<br>MUT  | AAT <u>GCTAGC</u> CCCGGCAGCGCCCGCCGTGC        |                                                |
|                     | ACGCAGCAAATTCT                                |                                                |
| GAPDH               | GTCATCCCTGAGCTAGACGG                          | GGGTCTTACTCCTTGGAGGC                           |
| GM-CSFR             | GCA TTC CTC CTG ATC CCA GA                    | CCT GGA GTC AAA CCT CAC ATT G                  |
| CD115               | CTAGGGACATCATGAATGACTC                        | GTTTATAGAACTTGCTGTTACC                         |

Note: # primers were designed by adding A at the 5' end (in bold) or truncating several bases at the 3' end to obtain a melting temperature (T<sub>m</sub>) of 55–68°C according to the manual for Ncode™ miRNA First-Strand cDNA Synthesis kit. @ The seeding region sequence of miR-155 was mutated in the forward and reverse primers (in italic bold). These two primers together with primers for LV-miR-155WT were used to generate LV-miR-155MUT. Restriction enzyme sites in primers were underlined.

### **Figure S1. miRNA expression analysis in human monocytes, imDCs and mDCs**

Shown are scatter plots of normalized miRNA microarray data for monocyte versus imDC (A), monocyte versus mDC (B), and imDC versus mDC (C). Dots represent individual miRNAs, and those for miR-221 and miR-155 are indicated by arrows.

### **Figure S2. Reduced secretion of IL-12p70 by mDCs from miR-155<sup>-/-</sup> mice**

BM derived imDCs ( $2.5 \times 10^5$  per well) at day 6 from WT or miR-155<sup>-/-</sup> (KO) mice were cultured in 24-well plates in 1 mL RPMI1640 culture medium supplemented with mGM-CSF (20 ng/mL). Cells were treated with LPS (0.25  $\mu$ g/ml) for 24 h. Supernatants were harvested and IL-12p70 was measured by ELISA. The data are means with 95% confidence intervals from three independent experiments. \*\* P<0.01 by two sample t test.

### **Figure S3. SOCS-1 is a target of miR-155**

(A) Multiple species sequence alignment of the SOCS-1 3' UTR including the predicted miR-155 target site sequence (in bold). Mutation of the miR155 target site sequence is shown below. (B) Luciferase reporter assays to confirm SOCS-1 3' UTR targeting by miR-155. The columns represent normalized relative luciferase activity (RLU) by means with 95% confidence intervals from two independent experiments. \*\* P<0.01 by two sample t test.

### **Figure S4. Over-expression of miR-155 in DCs significantly increases IL-12 production after stimulation with potent IL-12 inducers**

(A) Enhanced IL-12 production in DCs after over-expression of miR-155 and stimulation with LPS + R848 and poly(I:C) + the cocktail.<sup>1,2</sup> ImDCs at day 5 from two donors were transfected with 40 nM of miR-155 or negative control. 6 h later, cells were treated with the LPS [0.1  $\mu$ g/mL, cat# L2654, Sigma] + imidazoquinoline compound R848 (2.5  $\mu$ g/mL, InvivoGen) or poly(I:C) (20  $\mu$ g/mL, InvivoGen) + the cocktail in AIM V serum free medium supplemented with human GM-CSF and IL-4 for 16 h. Supernatants were harvested and IL-12p70 was measured by ELISA. The data are mean  $\pm$  SEM from three replicates. \*\* P<0.01 by two sample t test. (B) Flow cytometric analysis of CD83 maturation marker in DCs after over-expression of miR-155 and stimulation with LPS + R848 and poly(I:C) + the cocktail for 16 h. Unfilled histogram indicates an isotype control.

## REFERENCES

1. Kim HJ, Kim HO, Lee K, Baek EJ, Kim HS. Two-step maturation of immature DCs with proinflammatory cytokine cocktail and poly (I: C) enhances migratory and T cell stimulatory capacity. *Vaccine* 2010; 28(16):2877–86.
2. Hemmi H, Kaisho T, Takeuchi O, Sato S, Sanjo H, Hoshino K, et al. Small anti-viral compounds activate immune cells via the TLR7 MyD88-dependent signaling pathway. *Nat Immunol* 2002; 3(2):196–200.

Figure S1

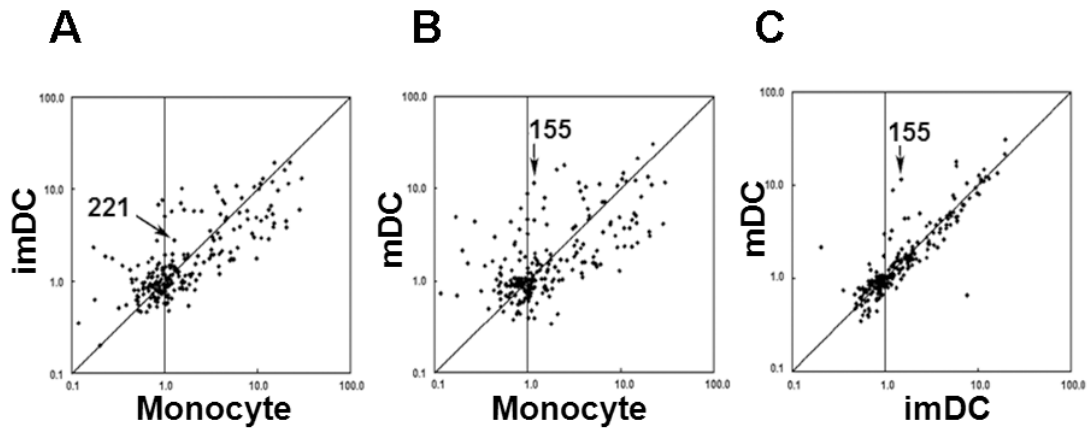

Figure S2

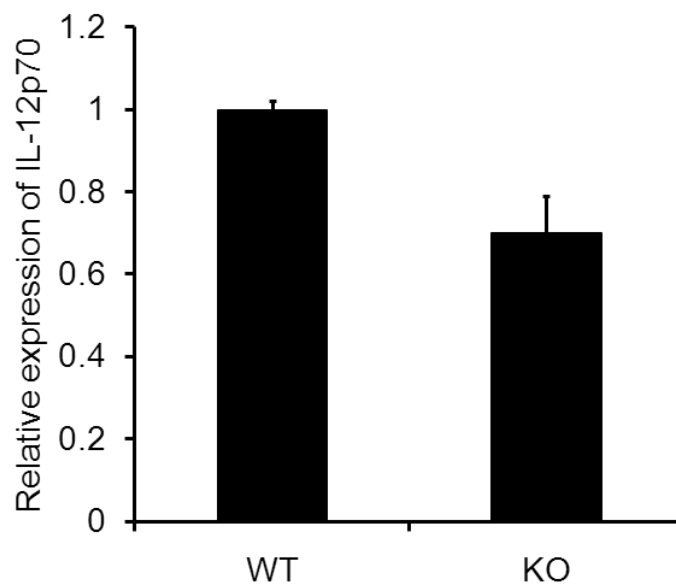

Figure S3

**A**

|                |                                        |
|----------------|----------------------------------------|
| Hsa-miR-155MUT | 3' tggggauagugcuaa <b>AGCAUUA</b> A 5' |
| Hsa-miR-155WT  | 3' tggggauagugcuaa <b>UCGUAAU</b> U 5' |
|                |                                        |
| Human          | - gccgcgctgacgc <b>AGCATTAA</b> ctg-   |
| Mouse          | - --ccgctgtgcc-gc <b>AGCATTAA</b> gtg- |
| Rat            | - --ccgccgtgccgc <b>AGCATTAA</b> gtg-  |
| Dog            | - -----cgcgcacgc <b>AGCATTAA</b> ctc-  |
| Chicken        | - -----gtac <b>AGCATTAA</b> ctg-       |
|                | <b>AATT</b>                            |
|                | <b>Mutant 3'UTR</b>                    |

**B**

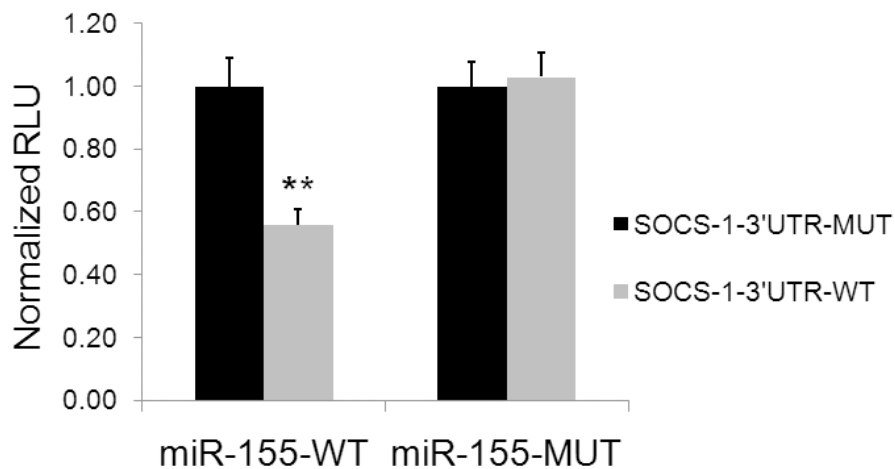

**A**

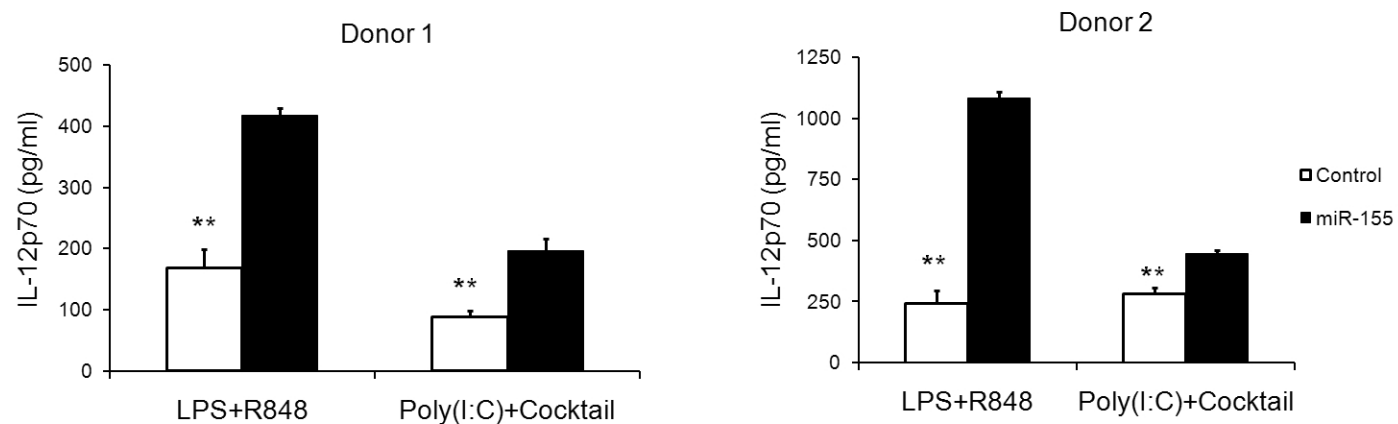

**B**

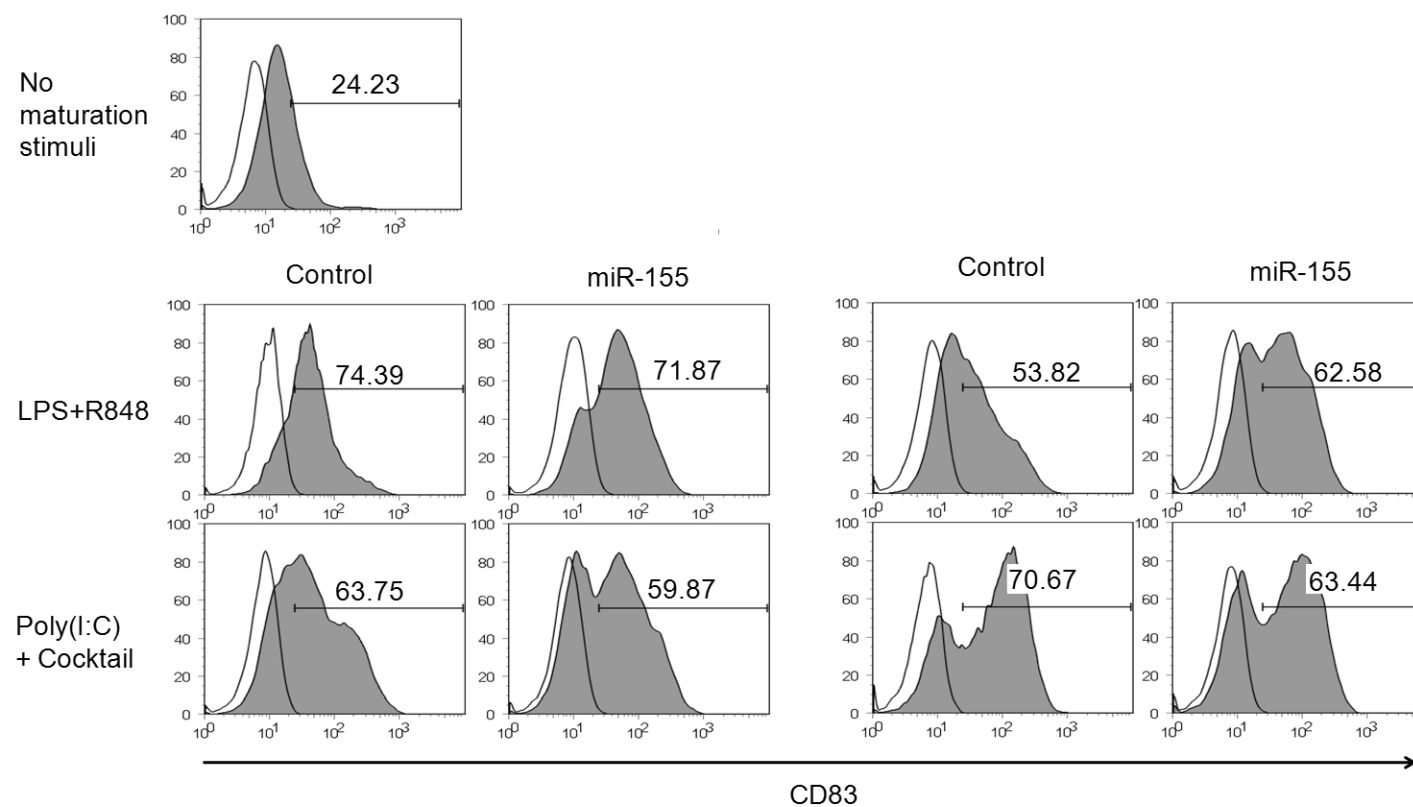

Supplement: supp_blood-2010-12-322503_Document1.pdf [file supp_blood-2010-12-322503_Document1.pdf]
